# Supplementary material for: Opioid suppression of an excitatory pontomedullary respiratory circuit by convergent mechanisms
Source: eLife. 2023 Jun 14;12:e81119. doi: 10.7554/eLife.81119 (PMC10317500; doi:10.7554/eLife.81119)
Supplement: Figure 2—source data 1. [file elife-81119-fig2-data1.xlsx]

## Sheet: panel C
Bregma	rVRG (Normalized Intensity)							Bregma	preBotC (Normalized Intensity)
-7.64	0.334388	1	0.415657					-7.52					0.020566
-7.6	0.50246	0.641322	0.395781					-7.48					0.010283
-7.56		0.666916	0.609593					-7.4		0.127782	0.130191		0.078149
-7.52	0.839642	0.672146	1	1	0.129982			-7.32		0.14874	0.119983	0.121908	0.123907
-7.48	0.865372		0.898482	0.783183	1			-7.26	0.199949		0.270206	0.175879	0.220051
-7.4	1	0.40225		0.494557	0.767682			-7.2	0.279216	0.359615	0.249861	0.263463	0.520823
-7.32	0.852636		0.812938					-7.14			0.399352		0.602057
-7.26	0.590806	0.289011	0.477942		0.92291			-7.08	0.505358	0.84401	0.457079	0.677358	0.583033
-7.2			0.544124	0.161167				-7.02	0.606612		0.57978	0.690141	0.79126
-7.14	0.37433	0.188722	0.511687	0.105494	0.924566			-6.96	0.782395	1	0.647331	0.927565	0.708997
-7.08	0.180471	0.205785	0.344292	0.0297647	0.507407			-6.9		0.455395	0.797833	0.855723	1
-7.02	0.381617		0.279404					-6.84	1		1	1	0.815938
-6.96	0.250262	0.091177	0.158067	0.0338148	0.210551			-6.78		0.256075	0.752892	0.937981	0.494602
-6.9	0.143316		0.131142					-6.72		0.195865	0.666841	0.982601	0.257584
-6.84	0.186388							-6.68	0.387507		0.611936	0.634868	0.12545
-6.78	0.0835314							-6.64			0.450286	0.930998	0.088432
-6.72								-6.56	0.282624		0.320408	0.385489
-6.68								-6.48	0.0985961		0.21328	0.227956
-6.64					0.110568			-6.42			0.099359	0.170908
-6.56								-6.36			0.061873	0.116582
								-6.3				0.103918
