# Supplementary material for: Opioid suppression of an excitatory pontomedullary respiratory circuit by convergent mechanisms
Source: eLife. 2023 Jun 14;12:e81119. doi: 10.7554/eLife.81119 (PMC10317500; doi:10.7554/eLife.81119)
Supplement: Figure 3—source data 1. [file elife-81119-fig3-data1.xlsx]

## Sheet: preBotC
oEPSC amplitude (pA) - preBotC recordings
	Pulse 1			Pulse 2				Holding current
	Baseline	ME	Wash	Baseline	ME	Wash		Baseline	ME Plateau	I-ME	Presence of ME GIRK Current?
	31.7	8.4	30.3	25.5	13	24.8		23.8	52.9	29.1	Yes
	22.1	7	15.5	20.5	7.8	18.5		-65.6	-71.4	-5.8	No
	10.3	5.4	11	11.3	8.4	8.4		6.4	90.9	84.5	Yes
	21	32	24	28.9	24.1	20		57.7	93.8	36.1	Yes
	50.6	14.6	24.3	54.6	15.9	19.5		34.6	128.5	93.9	Yes
	32.1	10.3	15.9	37.1	17.6	21.1		2.7	10.8	8.1	No
	91.5	15.8	52.7	125.2	25	40.7		9.6	29.3	19.7	yes
	20.1	23.5	14.2	24.3	27.3	23		3.1	27.6	24.5	Yes
	66.7	14.6	42.6	88.1	36	50.5		157.3	179	21.7	Yes
	64.1	25.1	50.5	55.2	31.8	49.3		126	143	17	Yes
	80	55.7	77.3	59.7	41	45.3		Cannot analyze			N/A
	59.5	7.2	29.1	44.1	8.6	32.1		-39	-44	-5	No
	9.9	5.1	9.9	15	4	9.2		-14	-9	5	No

## Sheet: rVRG
oEPSC amplitude (pA) - rVRG recordings
	Pulse 1			Pulse 2				Holding current
	Baseline	ME	Wash	Baseline	ME	Wash		Baseline	ME Plateau	I-ME	Presence of ME GIRK Current?
	42.3	38.4	41.1	32.9	29.6	27.6		79.8	150.8	71	Yes
	96.4	37.4		50	11.7			Cannot analyze			N/A
	34.5	11.2		39.5	14.5			Cannot analyze			N/A
	35.2	16.8	29	43.6	10.7	42.8		52.1	162.7	110.6	Yes
	10.2	6.8	9	17.4	13.4	9.2		8.2	17.7	9.5	Yes
	40.2	14.2	24	26.2	13.2	21.6		18.6	16.4	-2.2	No
	22	15.3	16.5	20.1	21	20		102.8	159.4	56.6	Yes
	106.6	36.4	104.8	123	37.4	111.3		39.9	94.7	54.8	Yes
	47.5	24.6	42.6	41.4	21.8	33.9		28.1	82.2	54.1	Yes

## Sheet: PPR
preBotC			rVRG
Baseline PPR Average	ME PPR Average		Baseline PPR Average	ME PPR Average
0.908795	1.77481		1.01537	0.816648
0.96479	1.47053		0.556922	1.80282
1.51125	1.90342		1.77676	2.45596
1.31786	1.66336		1.7077	1.11859
2.02043	2.39139		2.55127	5.27008
1.48262	4.40909		0.667012	1.00308
1.55047	2.48751		0.8055	2.65924
0.920939	2.73093		1.13213	3.39654
0.801308	0.896914		0.99942	2.86028
1.37123	2.44185
0.839127	0.944818

## Sheet: TTX+4AP & DNQX
oEPSC amplitude (pA) - pulse 1
	Baseline Average	TTX Average	TTX+4AP Average		Baseline Average	DNQX Average
	25.9	4.4	75.5		80	5.7
	14.6	4.4	35.6		9.9	5.7
	22	7.8	146.7		35.2	4.3
	18.5	6.8	111.4		40.2	3
	15.1	5.3	20.8		47.5	11.8
	47.5	11.4	106.8		14.6	5.3
	58.4	9.7	75.2		22	7.8
					18.5	1.9
					15.1	5.2
					47.5	11.8
					58.4	7.5
