# Supplementary material for: Opioid suppression of an excitatory pontomedullary respiratory circuit by convergent mechanisms
Source: eLife. 2023 Jun 14;12:e81119. doi: 10.7554/eLife.81119 (PMC10317500; doi:10.7554/eLife.81119)
Supplement: Figure 4—source data 1. [file elife-81119-fig4-data1.xlsx]

## Sheet: preBotC injection
	Opioid-sensitive neurons				Opioid non-sensitive neurons
	Baseline (pA)	ME plateau (pA)	I-ME (pA)		Baseline (pA)	ME plateau (pA)	I-ME (pA)
	24.8	60.3	35.5		-36.2	-35.8	0.4
	232.9	296.6	63.7		48.8	40.5	-8.3
	-13.2	11.8	25		-6.5	-3.6	2.9
	-4	32.6	36.6		-116	-117	-1
	-35.5	83.4	118.9		-33.6	-34.2	-0.6
	-237.4	-167.2	70.2		-32.4	-30.8	1.6
	10.8	40.2	29.4		106	110	4
	-10.3	43.7	54		34.7	30.6	-4.1
	5.5	19.2	13.7		7	1	-6
	-58.6	54.9	113.5
	-74.8	-60.4	14.4
	124.8	160.2	35.4
	-12.7	2.3	15

## Sheet: rVRG injection
	Opioid-sensitive neurons				Opioid non-sensitive neurons
	Baseline (pA)	ME plateau (pA)	I-ME (pA)		Baseline (pA)	ME plateau (pA)	I-ME (pA)
	-209	-150.7	58.3		-2	-5	-3
	15.4	119.2	103.8		-23.5	-24.9	-1.4
	-12.4	2.2	14.6		-15	-9.2	5.8
	-31	10	41		6.2	13.7	7.5
	19.6	93.1	73.5		-4.4	-4.7	-0.3
	-18.4	39.5	57.9		9.3	4.2	-5.1
	21	63	42
	-45.8	-66.4	20.6
	-20.6	13.6	34.2
	5.5	27.7	22.2
	103.4	152.9	49.5
	32.9	59.3	26.4
