# Supplementary material for: Opioid suppression of an excitatory pontomedullary respiratory circuit by convergent mechanisms
Source: eLife. 2023 Jun 14;12:e81119. doi: 10.7554/eLife.81119 (PMC10317500; doi:10.7554/eLife.81119)
Supplement: Figure 5—source data 1. [file elife-81119-fig5-data1.xlsx]

## Sheet: Sheet1
	% co-labeled neurons per slice
Animal #	rostral			midrostral			caudal
#5	73	65		53	62	32	33	0	29
#6	50	48	58	41	27	58	0	0	0
#7	63	58	60	59	43	56	50	22	0
#8	64	18	47	29	54	50
	# of retrograde labeled mCherry neurons per slice
Animal #	rostral			midrostral			caudal
#5	55	37		32	37	22	24	0	7
#6	12	23	40	32	11	24	0	0	0
#7	30	33	42	41	21	27	2	9	2
#8	11	17	15	14	13	18	0	0
	# of retrograde labeled GFP neurons per slice
Animal #	rostral			midrostral			caudal
#5	40	24		17	23	7	8	0	2
#6	6	11	23	13	3	14	0	0	0
#7	19	19	25	24	9	15	1	2	0
#8	7	3	7	4	7	9	0	0
